# Supplementary material for: Mechanistic insights into the formation of butene isomers from 1-butanol in H-ZSM-5: DFT based microkinetic modelling
Source: Royal Society of Chemistry journal article supplement (doi:10.1039/c6cy02474b), 2017-01-01
Supplement: c6cy02474b1.pdf [file c6cy02474b1.pdf]

## *Supporting Information*

Mechanistic insights into formation of butene isomers from 1-butanol  
in H-ZSM-5: DFT based microkinetic modelling

Mathew John, Konstantinos Alexopoulos, Marie-Françoise Reyniers\* and Guy B. Marin

*Laboratory for Chemical Technology, Ghent University, Technologiepark 914, B-9052 Gent,  
Belgium*

\* Corresponding author.

Tel.: +32 9 331 1735. Fax: +32 9 331 1759. E-mail: [MarieFrancoise.Reyniers@ugent.be](mailto:MarieFrancoise.Reyniers@ugent.be).

## **Table of Contents**

**S1. Statistical thermodynamic calculation**

**S2. Detailed reaction network**

**S3. Expression for the TOFs of individual reaction mechanisms**

## S1. Statistical thermodynamic calculation

The molecular partition function  $q$  for gas-phase species is calculated from statistical thermodynamics<sup>1</sup> as follows:

$$q(V, T) = q_{trans}(V, T)q_{vib}(T)q_{rot}(T) \quad (\text{S.1})$$

$q_{vib}$ ,  $q_{trans}$  and  $q_{rot}$  correspond to vibrational, translational and rotational molecular partition function, respectively.

Translational partition function

$$q_{trans}(V, T) = \left[ \frac{2\pi mk_B T}{h^2} \right]^{\frac{3}{2}} V \quad (\text{S.2})$$

Rotational partition function for non-linear molecule

$$q_{rot}(T) = \frac{\sqrt{\pi I_A I_B I_C}}{\sigma} \left( \frac{8\pi^2 k_B T}{h^2} \right)^{\frac{3}{2}} \quad (\text{S.3})$$

Vibrational partition function considering the zero-point vibrational energy (ZPVE) to be the zero reference point

$$q_{vib}(T) = \prod_i^{\frac{3n-6}{2}} \frac{1}{1 - \exp\left(\frac{-h\nu_i}{k_B T}\right)} \quad (\text{S.4})$$

where,  $n$  is the number of atoms in the molecule,  $h$  is the Planck constant,  $k_B$  is the Boltzmann factor,  $T$  is the temperature,  $\nu_i$  represent the vibrational frequencies obtained by a full hessian calculation with VASP,  $m$  is the molecular mass. For gas phase molecules, the volume  $V$  is calculated using an ideal gas equation.  $I_A$ ,  $I_B$ , and  $I_C$  are the principal moments of inertia,  $\sigma$  is symmetry number.

On the other hand, the molecular partition function for immobile surface species ( $q_{\text{immobile}}$ ) is calculated from statistical thermodynamics as follows:

$$q(T) = q_{\text{immobile}}(T) = q_{\text{vib}}(T) \quad (\text{S.5})$$

$$q_{\text{vib}}(T) = \prod_i^{3n} \frac{1}{1 - \exp\left(\frac{-h\nu_i}{k_B T}\right)} \quad (\text{S.6})$$

where,  $n$  is the number of atoms considered in the partial hessian calculation,  $h$  is the Planck constant,  $k_B$  is the Boltzmann factor,  $T$  is the temperature and  $\nu_i$  represent the vibrational frequencies obtained by a partial hessian calculation with VASP.

The total ensemble partition function  $Q(N, V, T)$  is given as:

$$Q(N, V, T) = \frac{[q(V, T)]^N}{N!} \quad (\text{S.7})$$

where,  $N$  is the number of particles and  $q$  is the molecular partition function.

Statistical thermodynamic calculation for internal energy (U), enthalpy (H), entropy (S) and Gibbs free energy (G) [Cramer]

$$U = E_{DFT-D2} + E_{ZPVE} + k_B T^2 \left( \frac{\partial \ln Q}{\partial T} \right)_{N,V} \quad (S.8)$$

$$H = U + PV = U + RT \quad (S.9)$$

$$S = k_B \ln Q + k_B T \left( \frac{\partial \ln Q}{\partial T} \right)_{N,V} \quad (S.10)$$

$$G = H - TS \quad (S.11)$$

where,  $E_{DFT-D2}$  is energy from the DFT-D2 calculation,  $Q$  is total partition function,  $E_{ZPVE}$  is the zero point vibrational energy calculated as the sum of all the molecular vibrational

energies at 0K ( $E_{ZPVE} = \sum_i^{\text{modes}} \frac{1}{2} h \nu_i$ ).

## S2. Detailed reaction network

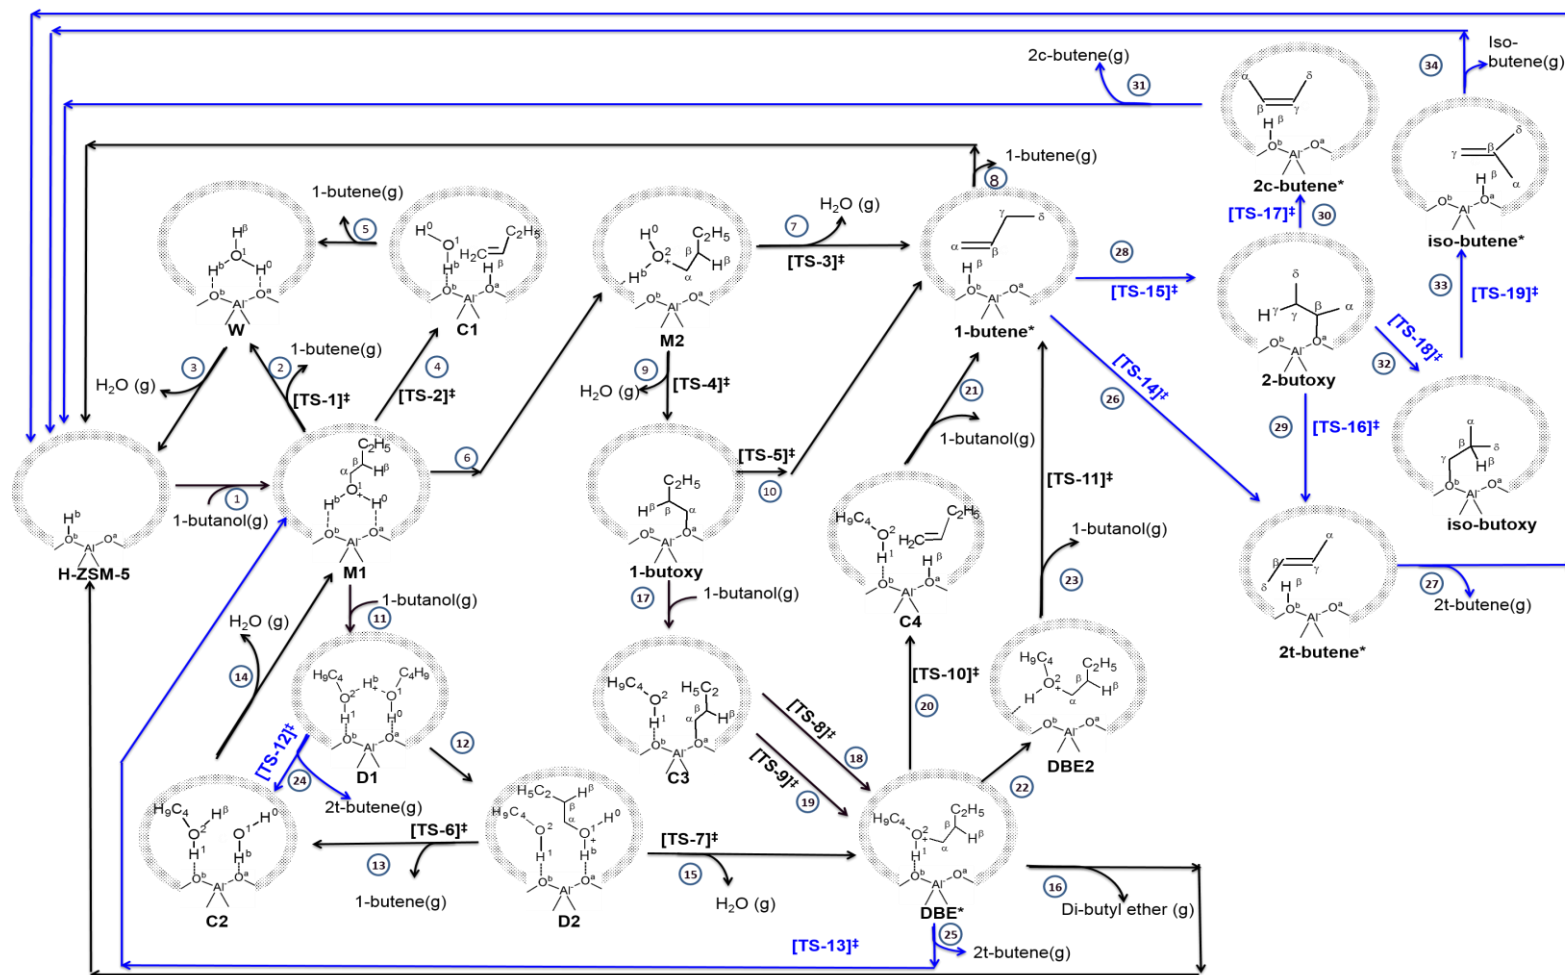

Figure S1: Detailed reaction network for 1-butanol dehydration to butene isomers in H-ZSM-5. Reaction steps in black and blue correspond to dehydration of 1-butanol to DBE / 1-butene<sup>2</sup> and 2t-butene/2c-butene/isobutene, respectively.

### S3. Expression for the TOFs of individual reaction mechanisms

For reaction mechanism involving a unique activated step, the TOF for that mechanism is equal to the TOF of the corresponding unique activated step. For e.g.

$$\text{TOF}_{m1} = \text{TOF}_{R2} \dots\dots\dots (\text{S.12})$$

$$\text{TOF}_{m2} = \text{TOF}_{R4} \dots\dots\dots (\text{S.13})$$

$$\text{TOF}_{m3} = \text{TOF}_{R7} \dots\dots\dots (\text{S.14})$$

$$\text{TOF}_{m4} = \text{TOF}_{R10} \dots\dots\dots (\text{S.15})$$

$$\text{TOF}_{m5} = \text{TOF}_{R13} \dots\dots\dots (\text{S.16})$$

$$\text{TOF}_{m6} = \text{TOF}_{R15} \dots\dots\dots (\text{S.17})$$

$$\text{TOF}_{m7} = \text{TOF}_{R18} \dots\dots\dots (\text{S.18})$$

$$\text{TOF}_{m8} = \text{TOF}_{R19} \dots\dots\dots (\text{S.19})$$

$$\text{TOF}_{m9} = \text{TOF}_{R20} \dots\dots\dots (\text{S.20})$$

$$\text{TOF}_{m10} = \text{TOF}_{R23} \dots\dots\dots (\text{S.21})$$

$$\text{TOF}_{m11} = \text{TOF}_{R24} \dots\dots\dots (\text{S.22})$$

$$\text{TOF}_{m12} = \text{TOF}_{R25} \dots\dots\dots (\text{S.23})$$

$$\text{TOF}_{m13} = \text{TOF}_{R26} \dots\dots\dots (\text{S.24})$$

For reaction mechanisms not having a unique activated step, a case specific algorithm is used for calculation of TOF. For e.g.

$$\text{TOF}_{R29} > 0, \text{ indicates } \text{TOF}_{m16} = \text{TOF}_{m18} = 0$$

$\text{TOF}_{R29} < 0$ , indicates  $\text{TOF}_{m14}=0$

$\text{TOF}_{R30} > 0$  indicates  $\text{TOF}_{m19} = 0$

$\text{TOF}_{R30} < 0$  indicates  $\text{TOF}_{m15} = \text{TOF}_{m16}=0$

Under most of the reaction conditions used in the present study the conversion of 2-butoxide to 2t-butene\* (R29) and 2c-butene\* (R30) have a net positive value for their TOF.

If ( $\text{TOF}_{R29} > 0$  and  $\text{TOF}_{R30} > 0$ )

$$\text{TOF}_{m14} = \text{TOF}_{R29} \dots \dots \dots (\text{S.25})$$

$$\text{TOF}_{m15} = \text{TOF}_{R30} \dots \dots \dots (\text{S.26})$$

$$\text{TOF}_{m16} = 0 \dots \dots \dots (\text{S.27})$$

$$\text{TOF}_{m17} = \text{TOF}_{R28} - \text{TOF}_{m14} - \text{TOF}_{m15} \dots \dots \dots (\text{S.28})$$

$$\text{TOF}_{m18} = 0 \dots \dots \dots (\text{S.29})$$

$$\text{TOF}_{m19} = 0 \dots \dots \dots (\text{S.30})$$

When the gas phase and surface concentration of 2t-butene is very high, 2t-butene\* can get converted into 2-butoxide ( i.e  $\text{TOF}_{R29} < 0$ )

If ( $\text{TOF}_{R29} < 0$  and  $\text{TOF}_{R30} > 0$ )

$$\text{TOF}_{m14} = 0 \dots \dots \dots (\text{S.31})$$

$$\text{TOF}_{m19} = 0 \dots \dots \dots (\text{S.32})$$

In order to obtain the TOF for reaction mechanisms m15-18, we have to solve for a linear set of algebraic equations



$$\text{TOF}_{m14} + \text{TOF}_{m15} + \text{TOF}_{m17} = \text{TOF}_{R28} \dots\dots\dots (\text{S.33})$$

as  $\text{TOF}_{m14} = 0$  equation 22 becomes

$$\text{TOF}_{m15} + \text{TOF}_{m17} = \text{TOF}_{R28} \dots\dots\dots (\text{S.34})$$

$$\text{TOF}_{m16} + \text{TOF}_{m18} = -\text{TOF}_{R29} \dots\dots\dots (\text{S.35})$$

$$\text{TOF}_{m15} + \text{TOF}_{m16} = \text{TOF}_{R30} \dots\dots\dots (\text{S.36})$$

$$\text{TOF}_{m17} + \text{TOF}_{m18} + \text{TOF}_{m19} = \text{TOF}_{R32} = \text{TOF}_{R33} \dots\dots\dots (\text{S.37})$$

as  $\text{TOF}_{m19} = 0$  equation 26 becomes

$$\text{TOF}_{m17} + \text{TOF}_{m18} = \text{TOF}_{R32} \dots\dots\dots (\text{S.38})$$

The above set of equations (eqns. 23-25 and 27 ) can be directly solved to obtain TOF for mechanisms m15-18.

Alternatively, when TOF for the formation of isobutene is negligible ( $\text{TOF}_{m17} \rightarrow 0$  and  $\text{TOF}_{m18} \rightarrow 0$ ), equation reduces to a much simplified form.

$$\text{TOF}_{m15} = \text{TOF}_{R28} \dots\dots\dots (\text{S.39})$$

$$\text{TOF}_{m16} = -\text{TOF}_{R29} \dots\dots\dots (\text{S.40})$$

Lastly, a scenario involving a net positive TOF for conversion of 2c-butene\* to 2-butoxy ( i.e.,  $\text{TOF}_{R30} < 0$  ) is not observed under reaction conditions used in the present study.

## References:

1. C. J. Cramer, *Essentials of computational chemistry : theories and models*, Wiley, Chichester Hoboken, NJ, 2nd edn., 2004.
2. M. John, K. Alexopoulos, M. F. Reyniers and G. B. Marin, *J Catal*, 2015, **330**, 28-45.
